# Supplementary material for: Disruption of Cytosolic Folate Integrity Aggravates Resistance to Epidermal Growth Factor Receptor Tyrosine Kinase Inhibitors and Modulates Metastatic Properties in Non-Small-Cell Lung Cancer Cells
Source: MDPI journal article supplement (doi:10.3390/ijms22168838), 2021-08-17

## Supplementary Table S1. Primer sets used for qPCR

| Gene                           | Forward Primer                 | Reverse Primer              |
|--------------------------------|--------------------------------|-----------------------------|
| <i>MMP-1</i>                   | 5'-AGCTAGCTCAGGATGACATTGATG-3' | 5'-GCCGATGGGCTGGACAG-3'     |
| <i>MMP-2</i>                   | 5'-GGCCCTGTCACTCCTGAGAT-3'     | 5'-GGCATCCAGGTTATCGGGGA-3'  |
| <i>MMP-7</i>                   | 5'-CTGGACGGATGGTAGCA-3'        | 5'-AAGAATGGCCAAGTTCATGAG-3' |
| <i>MMP-9</i>                   | 5'-TTGACAGCGACAAGAAGTGG-3'     | 5'-TCACGTCGTCCTTATGCAAG-3'  |
| NF- $\kappa$ B ( <i>RELA</i> ) | 5'-GGCCATGGACGAAGTGTCCC-3'     | 5'-GGAGGGTCCTTGGTGACCAG-3'  |
| <i>SLUG</i>                    | 5'-TGGTTGCTTCAAGGACACAT-3'     | 5'-GTTGCAGTGAGGGCAAGAA-3'   |
| <i>SOX-9</i>                   | 5'-GTACCCGCACTTGCACAAC-3'      | 5'-TCGGTCTCGTTCAGAAGTCTC-3' |
| <i>18S</i>                     | 5'-TGGCTCATTAAATCAGTTATG-3'    | 5'-CGGCATGTATTAGCTCTA-3'    |

Supplementary Figure S1

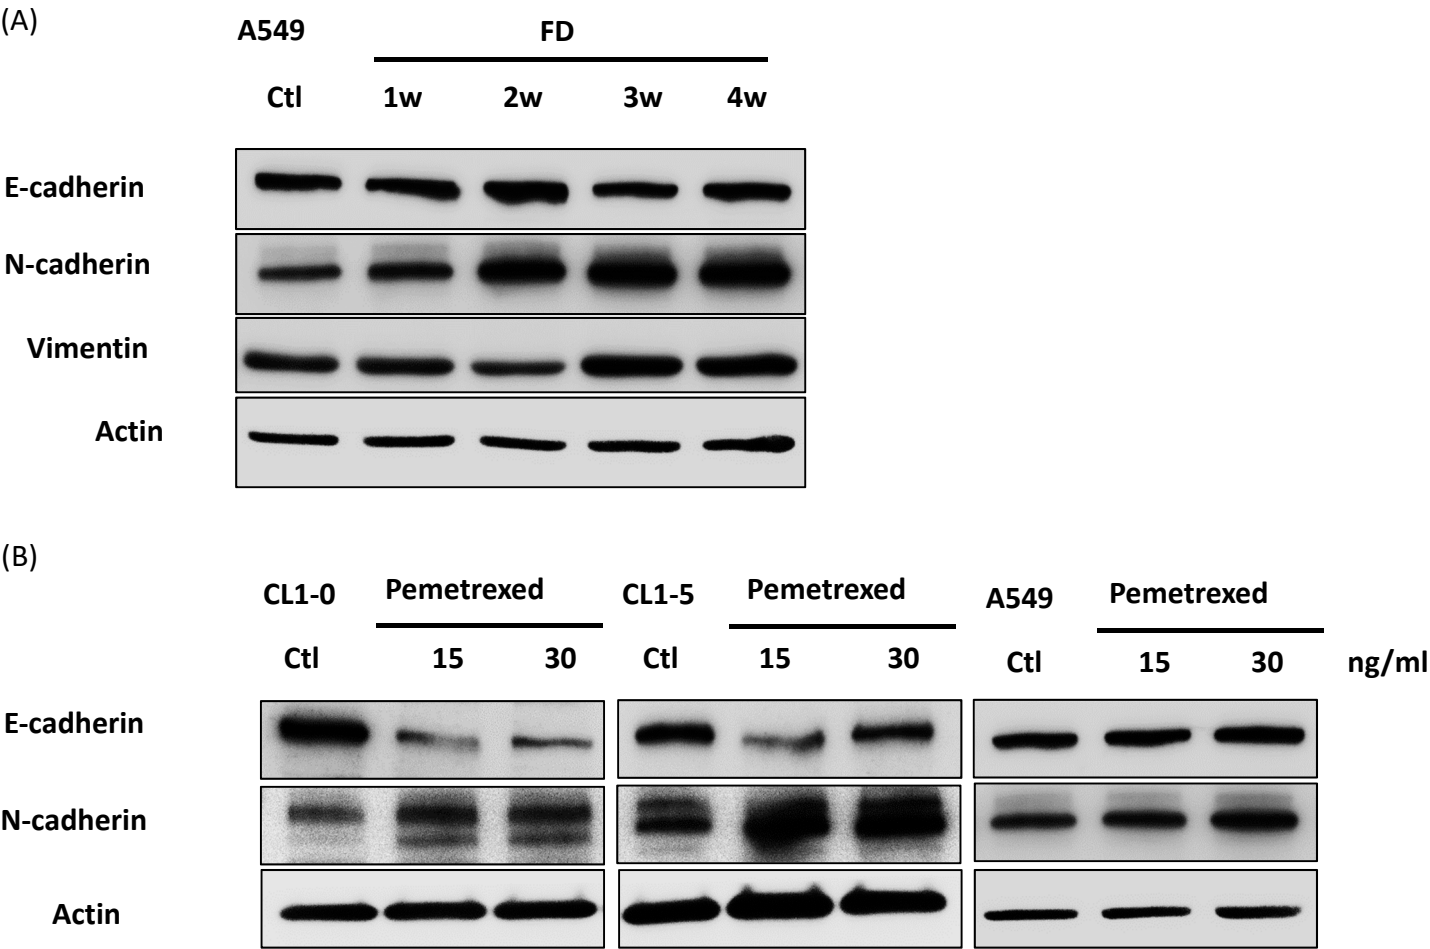

(C)

A549

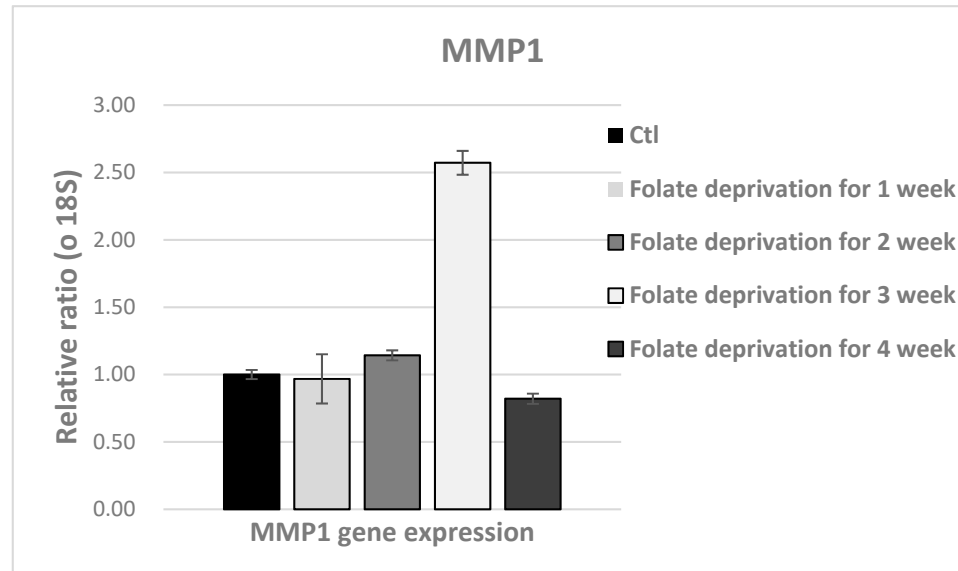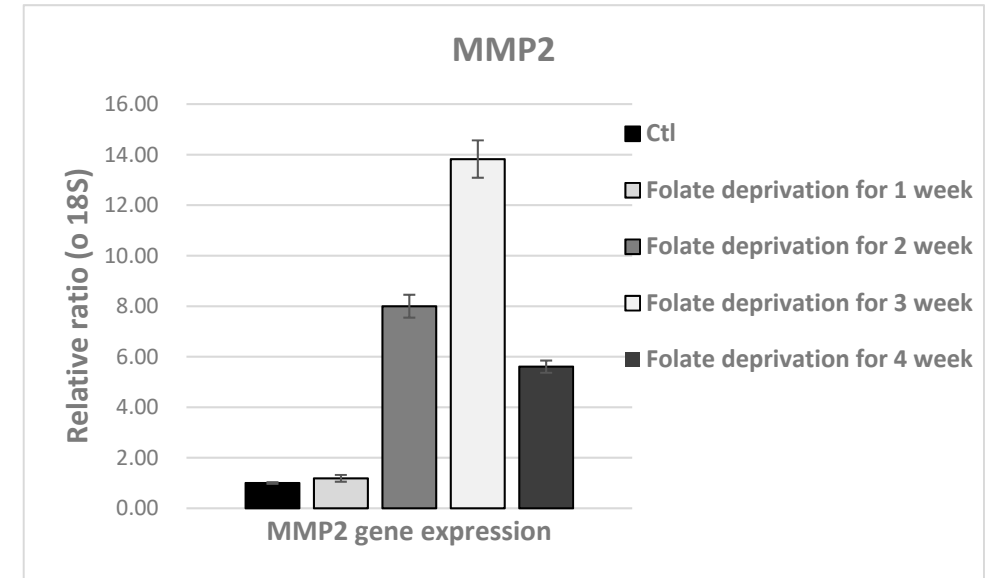

A549

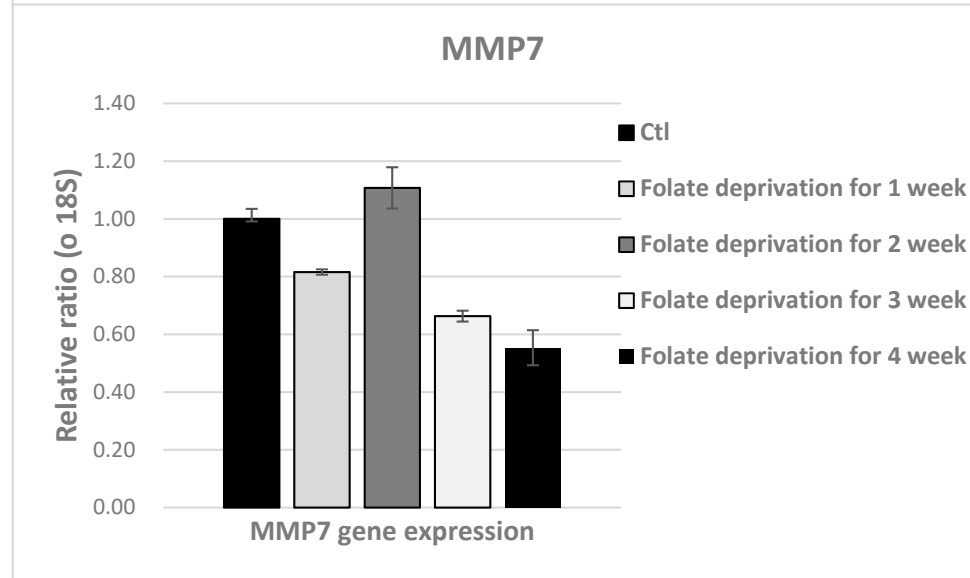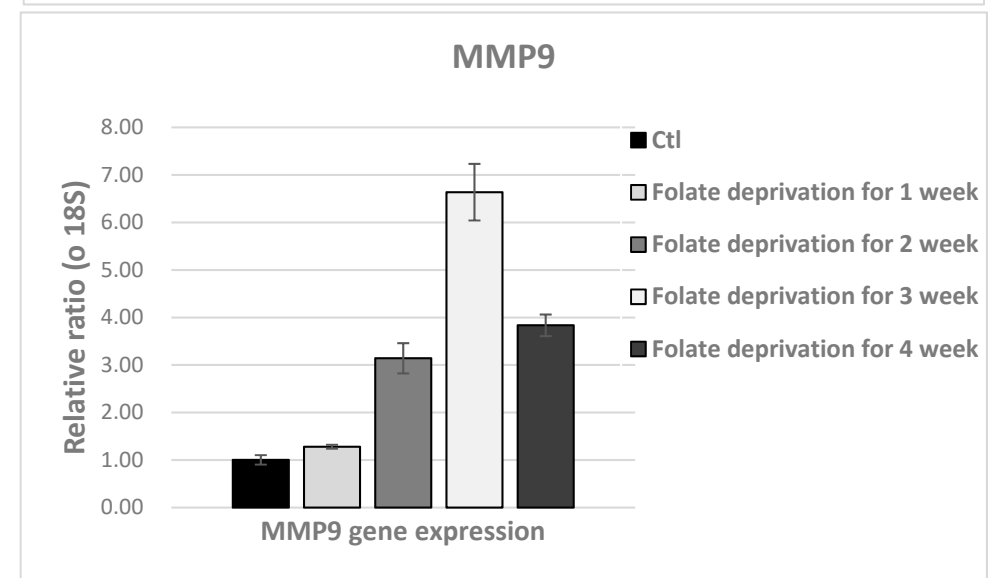

Supplement: s1 [file s1]
